# Supplementary material
Source: Springer Nature journal article supplement (https://www.springermedizin.de/resource/supplementary/13058_2011_3159_MOESM10_ESM.pdf/9703330)

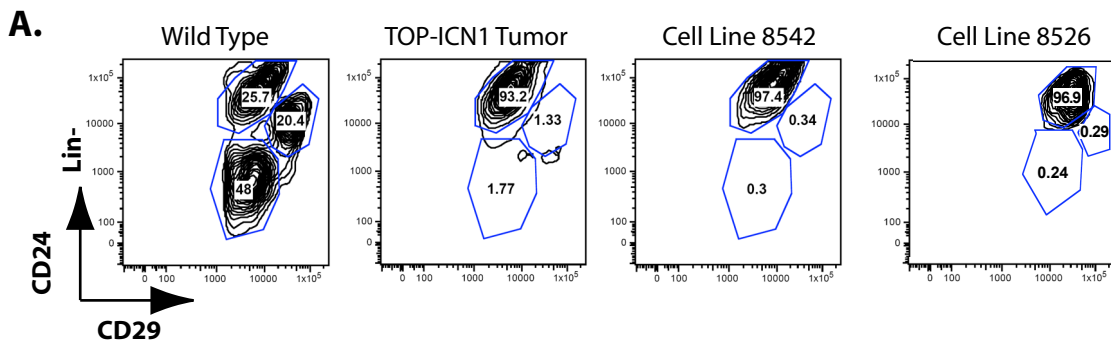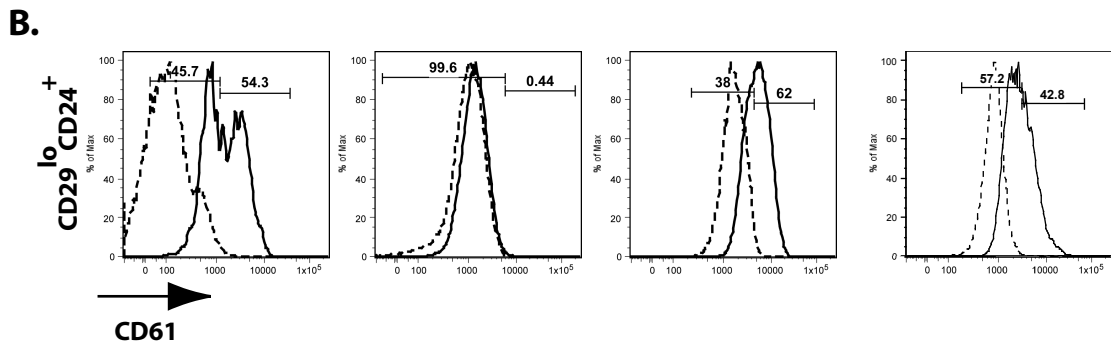

**C.** Cell Line 8542 Spheres

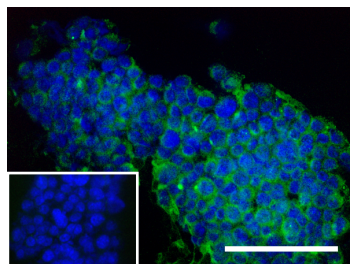

$\alpha$ -CD61  
DAPI

**D.** Primary Tumor Spheres

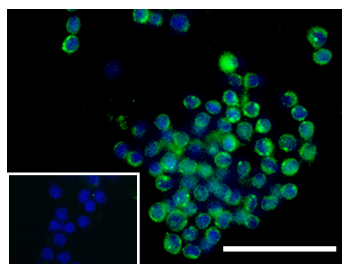

$\alpha$ -CD61  
DAPI

Supplement: MOESM10 [file 9703330]
